# Supplementary material
Source: PubMed Central journal article supplement (PMC4293449)
Supplement: supp_mol.114.093211_Supplemental_Figures_93211.pdf [file supp_mol.114.093211_Supplemental_Figures_93211.pdf]

## A Peptide Mimicking a Region in Proliferating Cell Nuclear Antigen (PCNA) Specific to Key Protein Interactions is Cytotoxic to Breast Cancer

Shanna J. Smith, Long Gu, Elizabeth A. Phipps, Lacey E. Dobrolecki, Karla S. Mabrey, Pattie Gulley, Kelsey L. Dillehay, Zhongyun Dong, Gregg B. Fields, Yun-Ru Chen, David Ann, Robert J. Hickey, and Linda H. Malkas

### Molecular Pharmacology

### Supplemental Information

Figure S1

|                       | 50 uM R9-caPep |        |         |        |        |        | 100 uM R9-caPep |         |         |        |         |         | 100 uM R9-scrambled |        |        |        |        |        |
|-----------------------|----------------|--------|---------|--------|--------|--------|-----------------|---------|---------|--------|---------|---------|---------------------|--------|--------|--------|--------|--------|
|                       | Annexin        |        |         | PI     |        |        | Annexin         |         |         | PI     |         |         | Annexin             |        |        | PI     |        |        |
|                       | 4 h            | 8 h    | 24 h    | 4 h    | 8 h    | 24 h   | 4 h             | 8 h     | 24 h    | 4 h    | 8 h     | 24 h    | 4 h                 | 8 h    | 24 h   | 4 h    | 8 h    | 24 h   |
| <b>Average (%)</b>    | 6.2667         | 5.8667 | 31.2667 | 1.2667 | 2.5000 | 5.3667 | 11.3667         | 18.3667 | 35.9667 | 3.8000 | 12.8333 | 22.8333 | 3.1000              | 2.4333 | 3.7000 | 2.6667 | 2.7667 | 1.8667 |
| <b>Std Dev (%)</b>    | 0.4041         | 1.8175 | 2.2502  | 0.2082 | 0.3000 | 1.3013 | 1.0970          | 1.7616  | 2.4420  | 0.3606 | 2.6026  | 1.1719  | 0.1732              | 0.3215 | 0.6557 | 0.8963 | 0.3512 | 0.2517 |
| <b># Observations</b> | 3              | 3      | 3       | 3      | 3      | 3      | 3               | 3       | 3       | 3      | 3       | 3       | 3                   | 3      | 3      | 3      | 3      | 3      |

Summary of flow cytometry data from Figure 4A. Exponentially growing ( $1 \times 10^6$ ) MDA-MB-436 cells were treated with increasing concentrations of R9-cc-caPeptide or 100  $\mu$ M R9-cc-scrambled up to 24 hours. Annexin V staining was then evaluated using flow cytometry, as detailed in the Materials and Methods section. The mean and standard deviation (Std Dev) of the %Annexin V and %Annexin V +PI positive cells, and number of observations for each time point are provided to supplement Figure 4A.

# A Peptide Mimicking a Region in Proliferating Cell Nuclear Antigen (PCNA) Specific to Key Protein Interactions is Cytotoxic to Breast Cancer

Shanna J. Smith, Long Gu, Elizabeth A. Phipps, Lacey E. Dobrolecki, Karla S. Mabrey, Pattie Gulley, Kelsey L. Dillehay, Zhongyun Dong, Gregg B. Fields, Yun-Ru Chen, David Ann, Robert J. Hickey, and Linda H. Malkas

## Molecular Pharmacology

### Supplemental Information

#### Figure S2

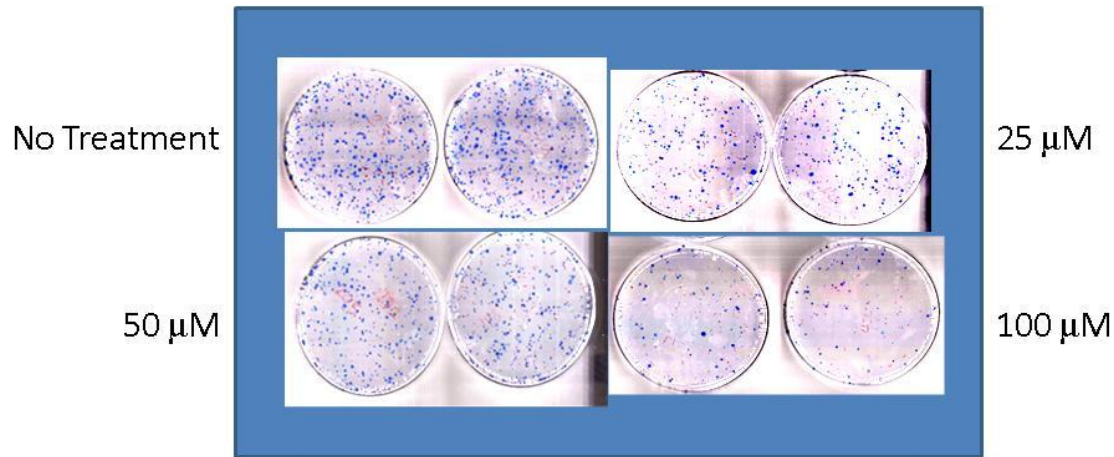

Representative images of colony formation assay. MDA-MB-436 ( $3 \times 10^5$ ) cells were treated with increasing concentrations of R9-cc-caPeptide for one hour, removed from the flask, and plated at 750 cells per 10 cm dish, and incubated for 14 days. Colonies were then counted, as detailed in the Materials and Methods section. Representative plates for each R9-cc-caPeptide treatment are shown.

**A Peptide Mimicking a Region in Proliferating Cell Nuclear Antigen (PCNA) Specific to Key Protein Interactions is Cytotoxic to Breast Cancer**

Shanna J. Smith, Long Gu, Elizabeth A. Phipps, Lacey E. Dobrolecki, Karla S. Mabrey, Pattie Gulley, Kelsey L. Dillehay, Zhongyun Dong, Gregg B. Fields, Yun-Ru Chen, David Ann, Robert J. Hickey, and Linda H. Malkas

**Molecular Pharmacology**

**Supplemental Information**

**Figure S3**

**control – no treatment**

**75  $\mu$ M R9-cc-caPeptide**

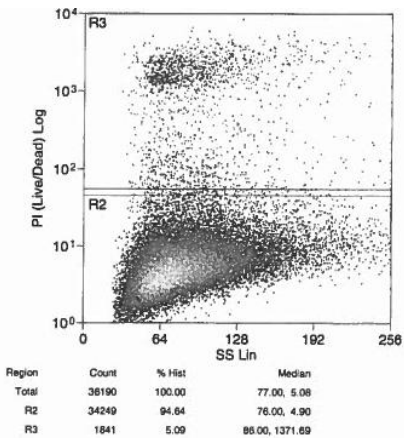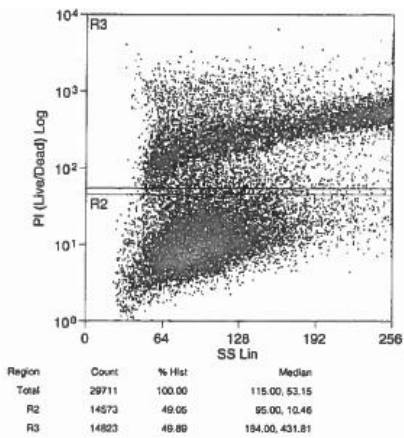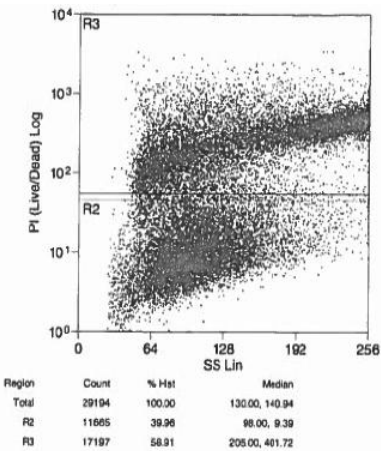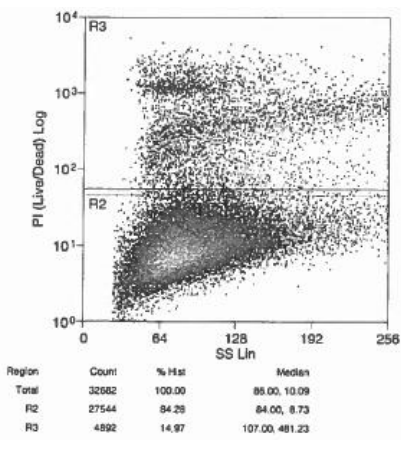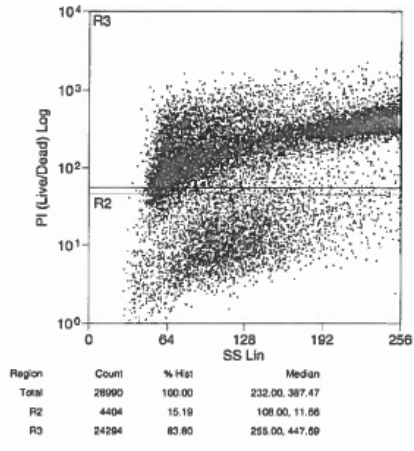

**similar response**

**decreased cytotoxicity**

**increased cytotoxicity**

Representative flow cytometry data for alanine scanning experiment. Exponentially growing ( $1 \times 10^6$ ) MDA-MB-436 cells were incubated with 75  $\mu$ M of R9-caPeptide or R9-cc-alanine substituted caPeptides for 24 hours. The cells were then analyzed by flow cytometry. % cell death was calculated in reference to control cells (no peptide treatment), with standard deviation displayed from an average of 5 separate experiments. A decrease of cell death indicates the amino acid substituted is critical to the cytotoxicity of the peptide sequence.
